# Supplementary material
Source: publisher site journal article supplement (https://www.dovepress.com/article/446911)
Supplement: Supplementary file 1 [file get_supplementary_file.php]

**Appendix 1. Literature search strategies**

**1. Database: Pubmed:**

((("Diabetic Foot"[Mesh]) OR (((((((((Foot, Diabetic[Title/Abstract])) OR (Diabetic Feet[Title/Abstract])) OR (Feet, Diabetic[Title/Abstract])) OR (Foot Ulcer, Diabetic[Title/Abstract])) OR (diabetic foot ulcer[Title/Abstract])) OR (diabetic foot complication[Title/Abstract])) OR (diabetic foot osteomyelitis[Title/Abstract])) OR (Diabetic foot infection[Title/Abstract]))) AND (("Methicillin-Resistant Staphylococcus aureus"[Mesh]) OR (((Methicillin Resistant Staphylococcus aureus[Title/Abstract])) OR (MRSA[Title/Abstract])))) AND (("Prevalence"[Mesh]) OR (((((((((((((Prevalences[Title/Abstract])) OR (Period Prevalence[Title/Abstract])) OR (Period Prevalences[Title/Abstract])) OR (Prevalence, Period[Title/Abstract])) OR (Point Prevalence[Title/Abstract])) OR (Point Prevalences[Title/Abstract])) OR (Prevalence, Point[Title/Abstract])) OR (incidence[Title/Abstract])) OR (epidemiology[Title/Abstract])) OR (frequency[Title/Abstract])) OR (occurrence[Title/Abstract])) OR (rate[Title/Abstract]))) (73)

1. **Database: Embase**

#10 #3 AND #6 AND #9 316

#9 #7 OR #8 6,978,400

#8 'prevalences':ab,ti OR 'period prevalence':ab,ti OR 'period prevalences':ab,ti OR 'prevalence, period':ab,ti OR 'point prevalence':ab,ti OR 'point prevalences':ab,ti OR 'prevalence, point':ab,ti OR 'incidence':ab,ti OR 'epidemiology':ab,ti OR 'frequency':ab,ti OR 'occurrence':ab,ti OR 'rate':ab,ti

6,055,047

#7 'prevalence'/exp OR 'prevalence' 1,381,154

#6 #4 OR #5 72,965

#5 'methicillin resistant staphylococcus aureus':ab,ti OR 'mrsa':ab,ti 49,544

#4 'methicillin resistant staphylococcus aureus'/exp OR 'methicillin resistant staphylococcus aureus'

67,917

#3 #1 OR #2 24,113

#2 'foot, diabetic':ab,ti OR 'diabetic feet':ab,ti OR 'feet, diabetic':ab,ti OR 'foot ulcer, diabetic':ab,ti OR 'diabetic foot ulcer':ab,ti OR 'diabetic foot complication':ab,ti OR 'diabetic foot osteomyelitis':ab,ti OR 'diabetic foot infection':ab,ti 4,526

#1 'diabetic foot'/exp OR 'diabetic foot' 24,050

1. **Database: Scopus**

( TITLE-ABS-KEY ( "diabetic foot" OR "foot, diabetic" OR "diabetic feet" OR "feet, diabetic" OR "foot ulcer, diabetic" OR "diabetic foot ulcer" OR "diabetic foot complication" OR "diabetic foot osteomyelitis" OR "diabetic foot infection" ) AND TITLE-ABS-KEY ( "methicillin-resistant staphylococcus aureus" OR "methicillin resistant staphylococcus aureus " OR "mrsa" ) AND TITLE-ABS-KEY ( "prevalence" OR "prevalences" OR "period prevalence" OR "period prevalences" OR "prevalence, period" OR "point prevalence" OR "point prevalences" OR "prevalence, point" OR "incidence" OR "" OR "epidemiology" OR "frequency" OR "occurrence" OR "rate" ) ) (358)

1. **Database: ovid**

# ▲ Searches Results Type Actions Annotations

1 (diabetic foot or Foot, Diabetic or Diabetic Feet or Feet, Diabetic or Foot Ulcer, Diabetic or diabetic foot ulcer or diabetic foot complication or diabetic foot osteomyelitis or Diabetic foot infection).ti,ab,kw. 11593

2 (Methicillin-Resistant Staphylococcus aureus or Methicillin Resistant Staphylococcus aureus or MRSA).ti,ab,kw. 36688

3 (Prevalence or Prevalences or Period Prevalence or Period Prevalences or Prevalence, Period or Point Prevalence or Point Prevalences or Prevalence, Point or incidence or epidemiology or frequency or occurrence or rate).ti,ab,kw. 5020306

4 1 and 2 and 3 113
